# Supplementary material for: Exercise rescues obese mothers’ insulin sensitivity, placental hypoxia and male offspring insulin sensitivity
Source: PubMed Central journal article supplement (PMC5349590; doi:10.1038/srep44650), 2017-03-14
Supplement: srep44650-s1.pdf [file srep44650-s1.pdf]

## **Supplementary Information**

**Title: Exercise rescues obese mothers' insulin sensitivity, placental hypoxia and male offspring insulin sensitivity**

### **Authors and affiliations:**

**Denise S. Fernandez-Twinn<sup>1\*</sup>, Geraldine Gascoin<sup>2</sup>, Barbara Musial<sup>3</sup>, Sarah Carr<sup>1</sup>, Daniella Duque-Guimaraes<sup>1</sup>, Heather L. Blackmore<sup>1</sup>, Maria Z. Alfaradhi<sup>1</sup>, Elena Loche<sup>1</sup>, Amanda N. Sferruzzi-Perri<sup>3</sup>, Abigail L. Fowden<sup>3</sup>, Susan E. Ozanne<sup>1</sup>**

1 University of Cambridge Metabolic Research Laboratories and MRC Metabolic Diseases Unit, Wellcome Trust-MRC Institute of Metabolic Science, Cambridge, UK

2 Department of Neonatal Medicine, University Hospital of Angers, Angers, France

3 Department of Physiology Development & Neuroscience, University of Cambridge, UK

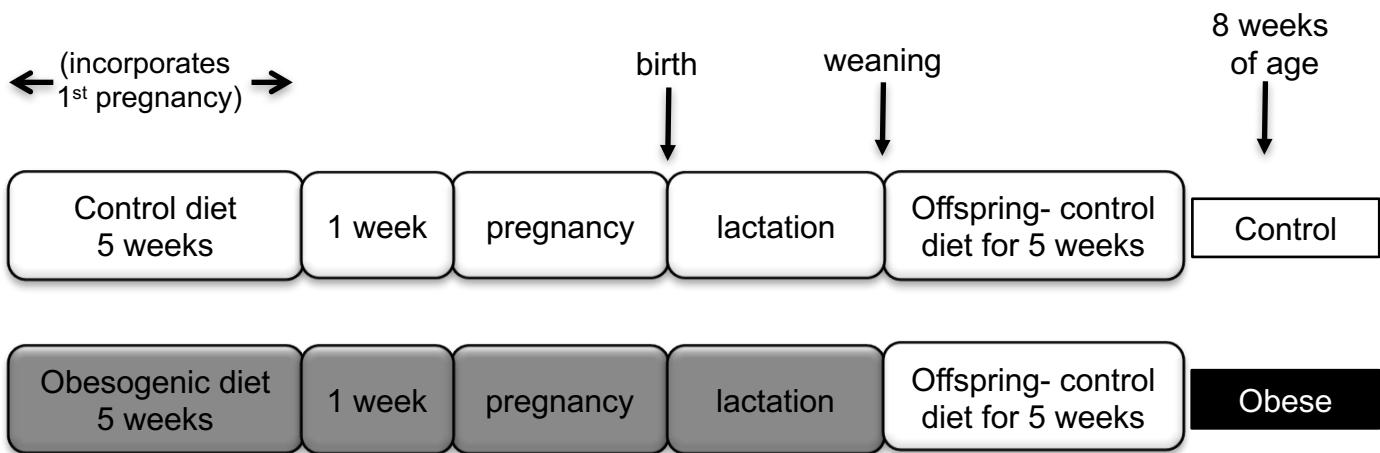

**Figure S1: Experimental protocol to generate control and obese dams and their offspring.** Blood for serum analysis was collected from dams at weaning and from 8 week old offspring (n=8 per group).

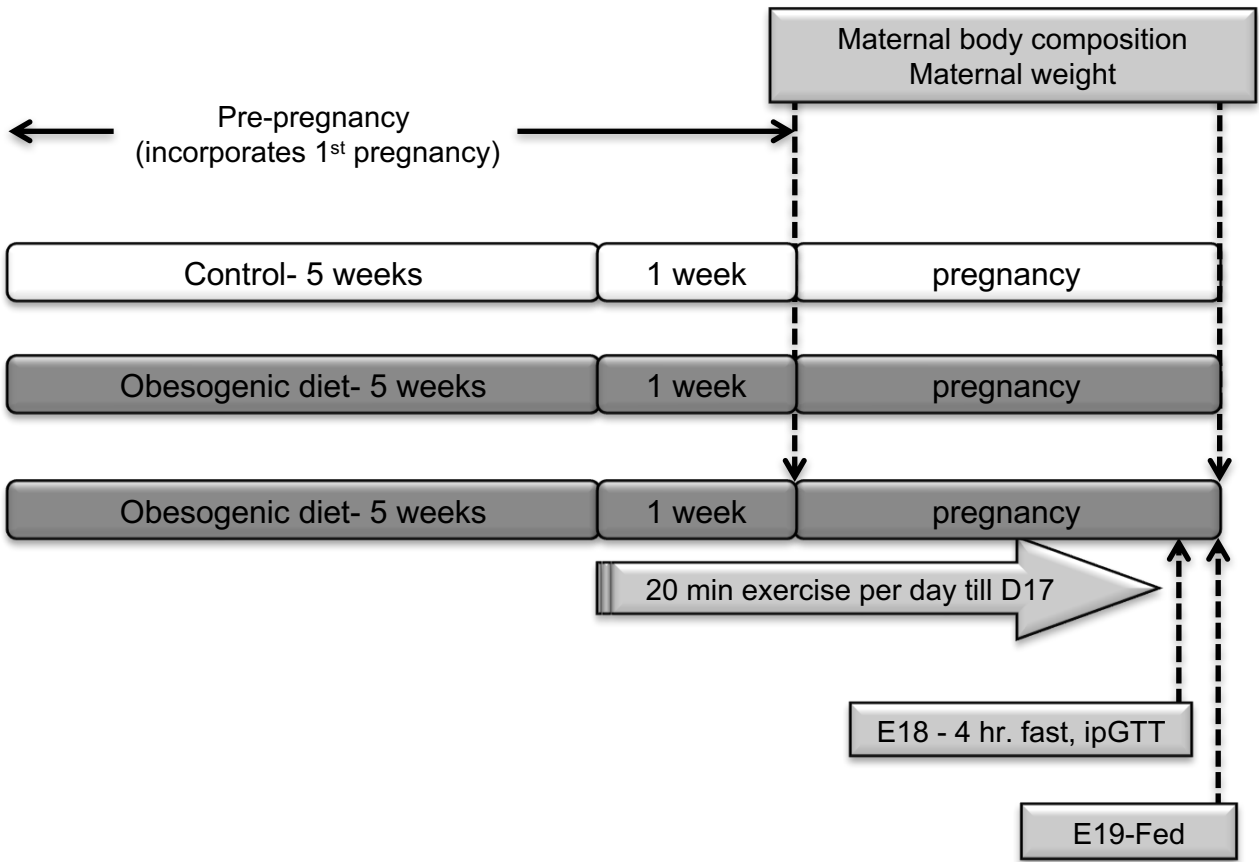

**Figure S2: Schematic of study design incorporating an exercise regime for obese females prior to and during pregnancy (n=6 dams per group).**

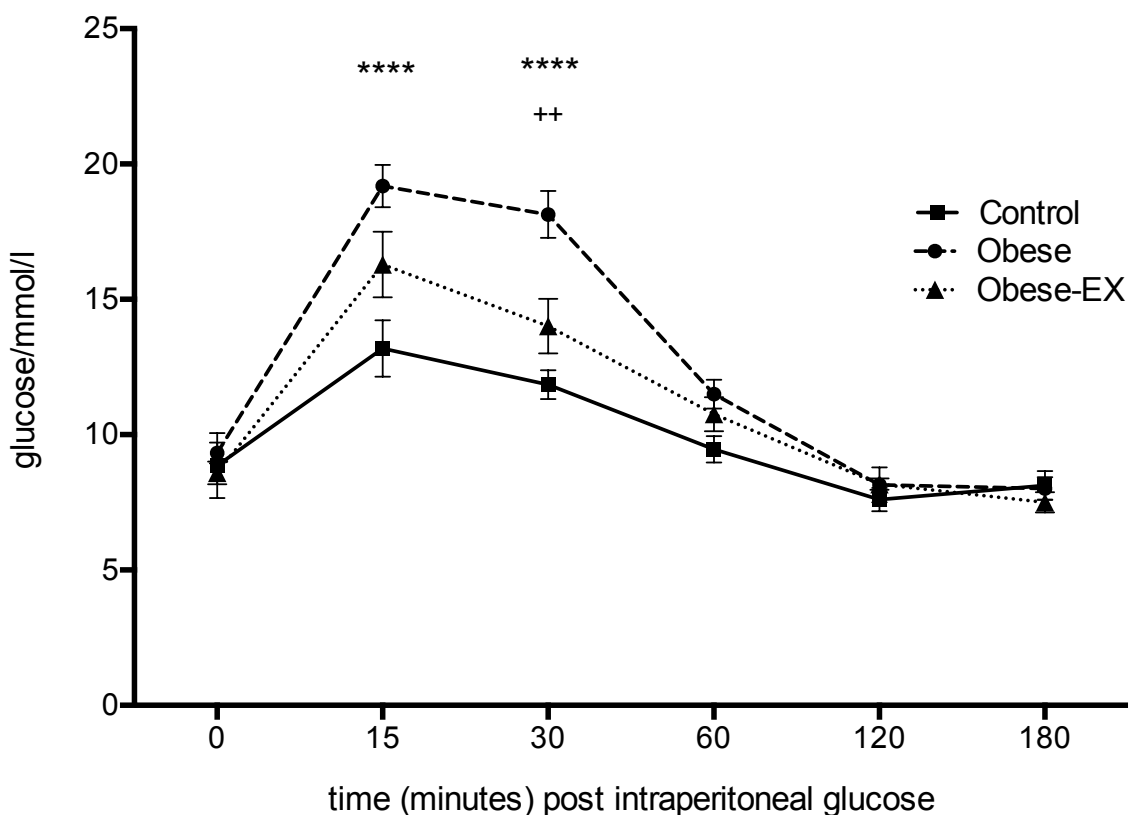

**Figure S3 : Glucose tolerance test at D18 of pregnancy.** On day 18 of gestation, dams were fasted for 4 hours, weighed and given an intraperitoneal dose of glucose (1g/kg). Tail blood glucose was measured at time 0 (before the injection) and then again at timed intervals from the time of injection. Tail blood glucose measurements throughout the GTT. Glucose levels (Controls- squares, Obese- circles, Obese-EX- triangles) are presented as means +/- SEM, n=6 dams per group and analyzed by two-way repeated measures ANOVA with Bonferroni multiple comparisons test. \*\*\*\* p<0.0001 Control vs. Obese; \*\*p=0.0109 Obese-EX vs. Obese.

**Supplementary Table 1: Forward and reverse primer sequences**

| <b>Primer</b>  | <b>Forward 5'-3'</b>     | <b>Reverse 5'-3'</b>     |
|----------------|--------------------------|--------------------------|
| <b>Sry</b>     | TCATGAGACTGCCAACCACAG    | CATGACCACCACCACCACCAA    |
| <b>Hif1a</b>   | GCGAGAACGAGAAGAAAAAGATGA | GGGGAAGTGGCAACTGATGA     |
| <b>Hprt</b>    | GCTCGAGATGTCATGAAGGAGAT  | AAAGAACTTATAGCCCCCCTTGA  |
| <b>B-Actin</b> | TTCAACACCCCAGCCATGTA     | TGTGGTACGACCAGAGGCATAC   |
| <b>Ppia</b>    | AGGGTGGTGACTTTACACGC     | GATGCCAGGACCTGTATGCT     |
| <b>Pabp1</b>   | ATGTTGGGTGAACGGCTGTTTCCT | GAGCGGAGAGACTCTGGAGACTCG |
